# Supplementary material for: Patients’ Assessment of Transitions in Healthcare Settings: Development and Psychometric Analysis of the PATH questionnaire
Source: Research Square preprint supplement (doi:10.21203/rs.3.rs-6948404/v1), 2025-07-14
Supplement: Supplementary file 1 [file 078f7eb23ca3ed7b39d63c79.docx]

**Appendix 5: Reliability and agreement for PATH items**

The below table shows satisfactory test-retest reliability of PATH with prevalence-adjusted and bias-adjusted kappa values of 0.46-0.81

| **Table 1 – Weighted Kappa, PABAK, and percentage agreement for each PATH item** | | | | |
| --- | --- | --- | --- | --- |
| Item number | N | Weighted Kappa1 (SD) | PABAK2 (SD) | Agreement (SD) |
| 1 | 59 | 0.39 (0.24; 0.57) | 0.46 (0.31; 0.61) | 0.78 (0.72; 0.84) |
| 2 | 54 | 0.40 (0.21; 0.58) | 0.63 (0.50; 0.76) | 0.85 (0.80; 0.90) |
| 3 | 58 | 0.46 (0.34; 0.63) | 0.67 (0.55; 0.78) | 0.87 (0.82; 0.91) |
| 4 | 58 | 0.47 (0.34; 0.64) | 0.58 (0.44; 0.72) | 0.83 (0.78; 0.89) |
| 5 | 59 | 0.37 (0.25; 0.58) | 0.56 (0.42; 0.69) | 0.82 (0.77; 0.87) |
| 6 | 58 | 0.38 (0.16; 0.52) | 0.56 (0.41; 0.70) | 0.82 (0.77; 0.88) |
| 7 | 109 | 0.55 (0.42; 0.62) | 0.70 (0.62; 0.77) | 0.88 (0.85; 0.91) |
| 8 | 105 | 0.52 (0.41; 0.63) | 0.67 (0.60; 0.75) | 0.87 (0.84; 0.90) |
| 9 | 103 | 0.57 (0.47; 0.68) | 0.69 (0.61; 0.77) | 0.88 (0.84; 0.91) |
| 10 | 104 | 0.58 (0.46; 0.70) | 0.60 (0.52; 0.69) | 0.84 (0.81; 0.88) |
| 11 | 110 | 0.60 (0.34; 0.71) | 0.77 (0.71; 0.83) | 0.91 (0.88; 0.93) |
| 12 | 104 | 0.69 (0.56; 0.78) | 0.81 (0.75; 0.88) | 0.93 (0.90; 0.95) |
| 13 | 109 | 0.54 (0.36; 0.67) | 0.75 (0.68; 0.82) | 0.90 (0.87; 0.93) |
| 14 | 106 | 0.55 (0.41; 0.67) | 0.66 (0.59; 0.74) | 0.87 (0.84; 0.90) |
| 15 | 107 | 0.60 (0.50; 0.70) | 0.79 (0.73; 0.85) | 0.92 (0.89; 0.94) |
| 16 | 108 | 0.61 (0.45; 0.69) | 0.75 (0.69; 0.82) | 0.90 (0.87; 0.93) |
| X | 105 | 0.53 (0.36; 0.66) | 0.71 (0.64; 0.79) | 0.89 (0.86; 0.91) |
| 17 | 103 | 0.45 (0.29; 0.55) | 0.68 (0.60; 0.75) | 0.87 (0.84; 0.90) |
| 18 | 84 | 0.47 (0.33; 0.61) | 0.59 (0.47; 0.71) | 0.84 (0.79; 0.88) |

1: Weighted kappa with linearly decreasing weights. 2: Prevalence-adjusted and bias-adjusted kappa.
