# Supplementary material for: Patients’ Assessment of Transitions in Healthcare Settings: Development and Psychometric Analysis of the PATH questionnaire
Source: Research Square preprint supplement (doi:10.21203/rs.3.rs-6948404/v1), 2025-07-14
Supplement: Supplementary file 2 [file 30a7a4147437fc4e32f659e5.docx]

|  | | **Table 3 – Exploratory factor analysis of PATH – prefinal version 3** | | | | | | | | |
| --- | --- | --- | --- | --- | --- | --- | --- | --- | --- | --- |
|  | | | 1 factor promax(4) rotation | | 2 factor promax(4) rotation | | | 2 factor promax(4) rotation | | |
| All Items | | Item X deleted2 | | | Items X and 14 deleted2 | | |
| Item number | Item name | | 1 | Com1 | 1 | 2 | Com1 | Kindness in Care | Access and Coordination | Com |
| 1 | In charge | | 0.52 | 0.34 |  | 0.60 | 0.33 |  | 0.57 | 0.31 |
| 2 | Access | | 0.67 | 0.5 |  | 0.63 | 0.5 |  | 0.60 | 0.5 |
| 3 | Questions | | 0.78 | 0.71 |  | 0.81 | 0.71 |  | 0.77 | 0.71 |
| 4 | Coherence | | 0.63 | 0.46 |  | 0.63 | 0.46 |  | 0.63 | 0.45 |
| 5 | Plan | | 0.76 | 0.67 |  | 0.79 | 0.67 |  | 0.80 | 0.68 |
| 6 | Coordination | | 0.79 | 0.75 |  | 0.85 | 0.75 |  | 0.84 | 0.75 |
| 7 | Involved decisions | | 0.85 | 0.72 | 0.53 | 0.38 | 0.72 | 0.55 | 0.36 | 0.72 |
| 8 | Worries | | 0.88 | 0.8 | 0.77 |  | 0.8 | 0.76 |  | 0.8 |
| 9 | Involved planning | | 0.77 | 0.61 | 0.66 |  | 0.62 | 0.68 |  | 0.63 |
| 10 | Holistic approach | | 0.62 | 0.42 | 0.67 |  | 0.42 | 0.68 |  | 0.42 |
| 11 | Caring care | | 0.78 | 0.71 | 0.92 |  | 0.7 | 0.90 |  | 0.71 |
| 12 | Trust | | 0.70 | 0.54 | 0.77 |  | 0.55 | 0.76 |  | 0.53 |
| 13 | Trust qualifications | | 0.81 | 0.7 | 0.79 |  | 0.7 | 0.78 |  | 0.7 |
| 14 | Know story | | 0.62 | 0.39 | 0.30 | 0.37 | 0.4 | - | - | - |
| 15 | Information compre | | 0.80 | 0.64 | 0.53 | 0.32 | 0.64 | 0.55 | 0.30 | 0.64 |
| 16 | Information suff | | 0.84 | 0.72 | 0.65 |  | 0.72 | 0.65 |  | 0.72 |
| X | Waiting time | | 0.53 | 0.28 | - | - | - | - | - | - |
| 17 | Appointment time | | 0.73 | 0.6 | 0.78 |  | 0.58 | 0.78 |  | 0.58 |
| 18 | Caretaker involve | | 0.49 | 0.27 | 0.54 |  | 0.27 | 0.56 |  | 0.29 |
| Explained variance % |  | | 84% |  | 79% | 72% |  | 80% | 71% |  |
| Cronbach’s alpha |  | | 0.94 |  | 0.93 | 0.87 |  | 0.93 | 0.87 |  |
|  | | 1: Communalities. 2: Empty cells = factorloadings < 0.30 | | | | | | | | |
