# Supplementary material for: Patients’ Assessment of Transitions in Healthcare Settings: Development and Psychometric Analysis of the PATH questionnaire
Source: Research Square preprint supplement (doi:10.21203/rs.3.rs-6948404/v1), 2025-07-14
Supplement: Supplementary file 3 [file 4d94ff63369999350840c4c6.docx]

Appendix 1: the PATH questionnaire

This questionnaire is about how YOU experience or have experienced your course of treatment and care.

By your course of treatment and care, we mean the help you have received regardless of whether it is for diagnosis, treatment, care, rehabilitation or other help in making your everyday life work. We are interested in YOUR impression of the process.

In the questions below, we use the word health professionals. By this, we mean all the people you have had contact with who have helped you with your health. These can include people such as health and social care assistants, nurses, doctors, and physiotherapists.

Who has been involved in your course of treatment over the past 3 months?

*Mark an X under all that apply.*

| General practitioner or medical centre | Hospital | Municipal rehabilitation | Community health nurse | Emergency medical service | Other/others |
| --- | --- | --- | --- | --- | --- |
|  |  |  |  |  |  |

If other or others – who?__________________________________________

# Questions about access and coordination

Do you have a regular healthcare professional who knows what is going on with you?

| Not at all | To a lesser extent | To some extent | To a great extent | To a very great extent | Not relevant |
| --- | --- | --- | --- | --- | --- |
|  |  |  |  |  |  |

Have you had access to help when you have needed it?

| Not at all | To a lesser extent | To some extent | To a great extent | To a very great extent | Not relevant |
| --- | --- | --- | --- | --- | --- |
|  |  |  |  |  |  |

Have you had the opportunity to ask questions when you have needed to?

| Not at all | To a lesser extent | To some extent | To a great extent | To a very great extent | Not relevant |
| --- | --- | --- | --- | --- | --- |
|  |  |  |  |  |  |

Has the information you have received from the health professionals been consistent?

| Not at all | To a lesser extent | To some extent | To a great extent | To a very great extent | Not relevant |
| --- | --- | --- | --- | --- | --- |
|  |  |  |  |  |  |

Has there been a plan for what was going to happen to you?

| Not at all | To a lesser extent | To some extent | To a great extent | To a very great extent | Not relevant |
| --- | --- | --- | --- | --- | --- |
|  |  |  |  |  |  |

Have the efforts regarding your health been well coordinated?

| Not at all | To a lesser extent | To some extent | To a great extent | To a very great extent | Not relevant |
| --- | --- | --- | --- | --- | --- |
|  |  |  |  |  |  |

# Questions about the care you have received

Have you been involved in the decisions about your health to the extent that you wanted?

|  | Not at all | To a lesser extent | To some extent | To a great extent | To a very great extent | Not relevant |
| --- | --- | --- | --- | --- | --- | --- |
| General practitioner or medical centre |  |  |  |  |  |  |
| Hospital |  |  |  |  |  |  |
| Municipal rehabilitation |  |  |  |  |  |  |
| Community health nurse |  |  |  |  |  |  |
| Emergency medical service |  |  |  |  |  |  |
| Other/others |  |  |  |  |  |  |

Do you feel your concerns have been listened to?

|  | Not at all | To a lesser extent | To some extent | To a great extent | To a very great extent | Not relevant |
| --- | --- | --- | --- | --- | --- | --- |
| General practitioner or medical centre |  |  |  |  |  |  |
| Hospital |  |  |  |  |  |  |
| Municipal rehabilitation |  |  |  |  |  |  |
| Community health nurse |  |  |  |  |  |  |
| Emergency medical service |  |  |  |  |  |  |
| Other/others |  |  |  |  |  |  |

Have you been involved in the scheduling of your treatment?

|  | Not at all | To a lesser extent | To some extent | To a great extent | To a very great extent | Not relevant |
| --- | --- | --- | --- | --- | --- | --- |
| General practitioner or medical centre |  |  |  |  |  |  |
| Hospital |  |  |  |  |  |  |
| Municipal rehabilitation |  |  |  |  |  |  |
| Community health nurse |  |  |  |  |  |  |
| Emergency medical service |  |  |  |  |  |  |
| Other/others |  |  |  |  |  |  |

Have you been asked about how your health has affected your life?

|  | Not at all | To a lesser extent | To some extent | To a great extent | To a very great extent | Not relevant |
| --- | --- | --- | --- | --- | --- | --- |
| General practitioner or medical centre |  |  |  |  |  |  |
| Hospital |  |  |  |  |  |  |
| Municipal rehabilitation |  |  |  |  |  |  |
| Community health nurse |  |  |  |  |  |  |
| Emergency medical service |  |  |  |  |  |  |
| Other/others |  |  |  |  |  |  |

Have you been treated in a compassionate way by the health professionals?

|  | Not at all | To a lesser extent | To some extent | To a great extent | To a very great extent | Not relevant |
| --- | --- | --- | --- | --- | --- | --- |
| General practitioner or medical centre |  |  |  |  |  |  |
| Hospital |  |  |  |  |  |  |
| Municipal rehabilitation |  |  |  |  |  |  |
| Community health nurse |  |  |  |  |  |  |
| Emergency medical service |  |  |  |  |  |  |
| Other/others |  |  |  |  |  |  |

Have you felt comfortable telling the healthcare professionals personal things about yourself?

|  | Not at all | To a lesser extent | To some extent | To a great extent | To a very great extent | Not relevant |
| --- | --- | --- | --- | --- | --- | --- |
| General practitioner or medical centre |  |  |  |  |  |  |
| Hospital |  |  |  |  |  |  |
| Municipal rehabilitation |  |  |  |  |  |  |
| Community health nurse |  |  |  |  |  |  |
| Emergency medical service |  |  |  |  |  |  |
| Other/others |  |  |  |  |  |  |

Has the information you have received been understandable?

|  | Not at all | To a lesser extent | To some extent | To a great extent | To a very great extent | Not relevant |
| --- | --- | --- | --- | --- | --- | --- |
| General practitioner or medical centre |  |  |  |  |  |  |
| Hospital |  |  |  |  |  |  |
| Municipal rehabilitation |  |  |  |  |  |  |
| Community health nurse |  |  |  |  |  |  |
| Emergency medical service |  |  |  |  |  |  |
| Other/others |  |  |  |  |  |  |

Have you received all the information you have needed?

|  | Not at all | To a lesser extent | To some extent | To a great extent | To a very great extent | Not relevant |
| --- | --- | --- | --- | --- | --- | --- |
| General practitioner or medical centre |  |  |  |  |  |  |
| Hospital |  |  |  |  |  |  |
| Municipal rehabilitation |  |  |  |  |  |  |
| Community health nurse |  |  |  |  |  |  |
| Emergency medical service |  |  |  |  |  |  |
| Other/others |  |  |  |  |  |  |

Have your relatives been involved to the extent you have wanted?

|  | Not at all | To a lesser extent | To some extent | To a great extent | To a very great extent | Not relevant |
| --- | --- | --- | --- | --- | --- | --- |
| General practitioner or medical centre |  |  |  |  |  |  |
| Hospital |  |  |  |  |  |  |
| Municipal rehabilitation |  |  |  |  |  |  |
| Community health nurse |  |  |  |  |  |  |
| Emergency medical service |  |  |  |  |  |  |
| Other/others |  |  |  |  |  |  |

Have you had confidence in the professional competence of the health professionals?

|  | Not at all | To a lesser extent | To some extent | To a great extent | To a very great extent | Not relevant |
| --- | --- | --- | --- | --- | --- | --- |
| General practitioner or medical centre |  |  |  |  |  |  |
| Hospital |  |  |  |  |  |  |
| Municipal rehabilitation |  |  |  |  |  |  |
| Community health nurse |  |  |  |  |  |  |
| Emergency medical service |  |  |  |  |  |  |
| Other/others |  |  |  |  |  |  |

When you have had appointments with health professionals, did you feel that you were given enough time?

|  | Not at all | To a lesser extent | To some extent | To a great extent | To a very great extent | Not relevant |
| --- | --- | --- | --- | --- | --- | --- |
| General practitioner or medical centre |  |  |  |  |  |  |
| Hospital |  |  |  |  |  |  |
| Municipal rehabilitation |  |  |  |  |  |  |
| Community health nurse |  |  |  |  |  |  |
| Emergency medical service |  |  |  |  |  |  |
| Other/others |  |  |  |  |  |  |

# Questions about the flow of information

Did the health professionals know your story?

|  | Not at all | To a lesser extent | To some extent | To a great extent | To a very great extent | Not relevant |
| --- | --- | --- | --- | --- | --- | --- |
| General practitioner or medical centre |  |  |  |  |  |  |
| Hospital |  |  |  |  |  |  |
| Municipal rehabilitation |  |  |  |  |  |  |
| Community health nurse |  |  |  |  |  |  |
| Emergency medical service |  |  |  |  |  |  |
| Other/others |  |  |  |  |  |  |

Do you have anything else you would like to tell us about your course of treatment and care or any comments on this questionnaire?
