# Supplementary material for: Patients’ Assessment of Transitions in Healthcare Settings: Development and Psychometric Analysis of the PATH questionnaire
Source: Research Square preprint supplement (doi:10.21203/rs.3.rs-6948404/v1), 2025-07-14
Supplement: Supplementary file 4 [file 8724ce8ec1f18c218853ad67.xlsx]

## Sheet: Ark1
Appendix 3: Correlation matrix of prefinal version of PATH
	in charge	access	questions	coherence	plan	coordination	involved decisions	worries	involved planning	holistic approach	caring care	trust	trust qualifications	know story	information compre	information suff	waiting time	appointment time	caretaker involve
In charge
access	0.464769
questions	0.512643	0.721251
coherence	0.328529	0.459408	0.521267
plan	0.418015	0.472826	0.643623	0.596681
coordination	0.491596	0.542092	0.696163	0.631565	0.782686
involved decisions	0.393201	0.561463	0.65598	0.536855	0.647059	0.66022
worries	0.38746	0.53457	0.606181	0.498712	0.651551	0.656133	0.796942
involved planning	0.393788	0.463929	0.523438	0.422057	0.55423	0.560729	0.772687	0.787109
holistic approach	0.33348	0.357558	0.405495	0.330293	0.326288	0.407456	0.505006	0.573189	0.54696
caring care	0.271847	0.445621	0.500776	0.419794	0.514795	0.577878	0.636489	0.755937	0.595192	0.456821
trust	0.316989	0.454207	0.528418	0.356534	0.409356	0.470372	0.501454	0.585898	0.49202	0.54211	0.673932
trust qualifications	0.352108	0.466332	0.549252	0.463304	0.596019	0.600256	0.671733	0.752626	0.612219	0.423922	0.791779	0.59713
know story	0.415486	0.39098	0.44852	0.425064	0.484356	0.535781	0.47115	0.498809	0.438819	0.444181	0.405297	0.55995	0.444073
information compre	0.338063	0.528627	0.653114	0.503314	0.600444	0.583223	0.68475	0.70008	0.616407	0.518173	0.56428	0.522608	0.649216	0.5485
information suff	0.370494	0.478288	0.614969	0.501152	0.669805	0.652125	0.72686	0.753743	0.652239	0.522309	0.70633	0.560797	0.7353	0.526208	0.735113
waiting time	0.355644	0.354284	0.376708	0.335252	0.336123	0.375867	0.478477	0.432858	0.360368	0.343236	0.469504	0.312467	0.42951	0.253728	0.424652	0.446777
appointment time	0.343126	0.485936	0.459487	0.41541	0.456644	0.452901	0.607017	0.647754	0.585205	0.520511	0.616299	0.56794	0.632287	0.438414	0.597064	0.607901	0.524293
caretaker involve	0.221114	0.337731	0.392301	0.307698	0.271865	0.289275	0.382154	0.419984	0.365856	0.372411	0.387498	0.419823	0.446153	0.281318	0.427609	0.42625	0.183723	0.456392
