# Supplementary material for: Patients’ Assessment of Transitions in Healthcare Settings: Development and Psychometric Analysis of the PATH questionnaire
Source: Research Square preprint supplement (doi:10.21203/rs.3.rs-6948404/v1), 2025-07-14
Supplement: Supplementary file 5 [file a839e3d3a3b48d12ed13455a.docx]

| Healthcare Provider | Item | Not at all | To a lesser extent | To some extent | To a great extent | To a very great extent | Median (IQR) | Not relevant | Missing response | N Number of complete responses | Skewness | Kurtosis |
| --- | --- | --- | --- | --- | --- | --- | --- | --- | --- | --- | --- | --- |
|  | 1. In charge | 56 | 42 | 89 | 82 | 39 | 3 (2-4) | 20 (6%) | 1 (<1%) | 328 | 0 | 2 |
|  | 2. Access | 11 | 17 | 62 | 128 | 86 | 4 (3-5) | 24 (7%) | 1 (<1%) | 328 | -1 | 4 |
|  | 3. Questions | 5 | 24 | 64 | 137 | 90 | 4 (3-5) | 8 (2%) | 1 (<1%) | 328 | -1 | 3 |
|  | 4. Coherence | 31 | 20 | 82 | 127 | 57 | 4 (3-4) | 9 (3%) | 3 (<1%) | 326 | -1 | 3 |
|  | 5. Plan | 11 | 28 | 67 | 132 | 88 | 4 (3-5) | 3 (1%) | 0 (<1%) | 329 | -1 | 3 |
|  | 6. Coordination | 20 | 27 | 72 | 136 | 68 | 4 (3-4) | 5 (2%) | 1 (<1%) | 328 | -1 | 3 |
| General practitioner |  |  |  |  |  |  |  |  |  | 187 |  |  |
|  | 7. Involved decisions | 8 | 14 | 29 | 67 | 54 | 4 (3-5) | 9 (5%) | 6 (3%) | 181 | -1 | 3 |
|  | 8. Worries | 5 | 8 | 32 | 66 | 51 | 4 (3-5) | 19 (10%) | 6 (3%) | 181 | -1 | 4 |
|  | 9. Involved planning | 8 | 15 | 41 | 48 | 40 | 4 (3-5) | 29 (16%) | 6 (3%) | 181 | -1 | 3 |
|  | 10. Holistic approach | 39 | 23 | 48 | 31 | 17 | 3 (2-4) | 22 (12%) | 7 (4%) | 180 | 0 | 2 |
|  | 11. Caring care | 6 | 6 | 20 | 68 | 66 | 4 (4-5) | 10 (6%) | 11 (6%) | 176 | -1 | 5 |
|  | 12. Trust | 3 | 8 | 19 | 60 | 66 | 4 (4-5) | 20 (11%) | 11 (6%) | 176 | -1 | 4 |
|  | 13. Trust qualifications | 5 | 6 | 30 | 73 | 58 | 4 (4-5) | 3 (2%) | 12 (6%) | 175 | -1 | 4 |
|  | 14. Know story | 6 | 15 | 42 | 55 | 46 | 4 (3-5) | 11 (6%) | 12 (6%) | 175 | -1 | 3 |
|  | 15. Information compre | 0 | 4 | 32 | 72 | 56 | 4 (4-5) | 8 (5%) | 15 (8%) | 172 | 0 | 3 |
|  | 16. Information suff | 6 | 6 | 35 | 72 | 48 | 4 (3-5) | 8 (5%) | 12 (6%) | 175 | -1 | 4 |
|  | X. Waiting time | 2 | 4 | 32 | 62 | 66 | 4 (4-5) | 8 (5%) | 13 (7%) | 174 | -1 | 4 |
|  | 17. Appointment time | 10 | 13 | 38 | 62 | 45 | 4 (3-5) | 6 (3%) | 13 (7%) | 174 | -1 | 3 |
|  | 18. Caretaker involve | 10 | 10 | 22 | 48 | 35 | 4 (3-5) | 50 (29%) | 12 (6%) | 175 | -1 | 3 |
| Hospital |  |  |  |  |  |  |  |  |  | 312 |  |  |
|  | 7. Involved decisions | 10 | 19 | 57 | 128 | 81 | 4 (3-5) | 4 (1%) | 13 (4%) | 299 | -1 | 4 |
|  | 8. Worries | 6 | 24 | 48 | 111 | 98 | 4 (3-5) | 14 (5%) | 11 (4%) | 301 | -1 | 3 |
|  | 9. Involved planning | 15 | 31 | 61 | 108 | 66 | 4 (3-4) | 19 (6%) | 12 (4%) | 300 | -1 | 3 |
|  | 10. Holistic approach | 55 | 52 | 68 | 64 | 32 | 3 (2-4) | 27 (9%) | 14 (4%) | 298 | 0 | 2 |
|  | 11. Caring care | 1 | 5 | 39 | 107 | 140 | 4 (4-5) | 2 (1%) | 18 (6%) | 294 | -1 | 4 |
|  | 12. Trust | 5 | 9 | 40 | 107 | 109 | 4 (4-5) | 24 (8%) | 18 (6%) | 294 | -1 | 4 |
|  | 13. Trust qualifications | 2 | 6 | 38 | 121 | 124 | 4 (4-5) | 4 (1%) | 17 (5%) | 295 | -1 | 4 |
|  | 14. Know story | 13 | 38 | 86 | 94 | 46 | 4 (3-4) | 13 (4%) | 22 (7%) | 290 | 0 | 3 |
|  | 15. Information compre | 2 | 12 | 56 | 127 | 91 | 4 (4-5) | 3 (1%) | 21 (7%) | 291 | -1 | 3 |
|  | 16. Information suff | 5 | 17 | 66 | 112 | 89 | 4 (3-5) | 2 (1%) | 21 (7%) | 291 | -1 | 3 |
|  | X. Waiting time | 4 | 13 | 59 | 105 | 100 | 4 (3-5) | 8 (3%) | 23 (7%) | 289 | -1 | 3 |
|  | 17. Appointment time | 3 | 6 | 48 | 122 | 98 | 4 (4-5) | 12 (4%) | 23 (7%) | 289 | -1 | 4 |
|  | 18. Caretaker involve | 17 | 13 | 37 | 88 | 98 | 4 (3-5) | 36 (12%) | 23 (7%) | 289 | -1 | 4 |
| Home Care |  |  |  |  |  |  |  |  |  | 58 |  |  |
|  | 7. Involved decisions | 3 | 7 | 18 | 21 | 6 | 3 (3-4) | 10 (18%) | 2 (3%) | 57 | 0 | 3 |
|  | 8. Worries | 1 | 7 | 16 | 19 | 8 | 4 (3-4) | 9 (16%) | 2 (3%) | 57 | 0 | 3 |
|  | 9. Involved planning | 4 | 5 | 18 | 15 | 4 | 3 (3-4) | 3 (5%) | 5 (9%) | 56 | 0 | 3 |
|  | 10. Holistic approach | 11 | 13 | 13 | 6 | 4 | 2 (2-3) | 10 (18%) | 5 (9%) | 56 | 0 | 2 |
|  | 11. Caring care | 1 | 2 | 11 | 25 | 11 | 4 (3-4) | 6 (11%) | 5 (9%) | 53 | -1 | 4 |
|  | 12. Trust | 1 | 4 | 14 | 13 | 11 | 4 (3-5) | 4 (8%) | 5 (9%) | 53 | 0 | 2 |
|  | 13. Trust qualifications | 1 | 4 | 14 | 20 | 8 | 4 (3-4) | 5 (9%) | 6 (10%) | 53 | 0 | 3 |
|  | 14. Know story | 4 | 12 | 17 | 11 | 5 | 3 (2-4) | 7 (13%) | 5 (9%) | 53 | 0 | 2 |
|  | 15. Information compre | 0 | 2 | 21 | 18 | 6 | 6 (4-3) | 4 (8%) | 5 (9%) | 52 | 0 | 2 |
|  | 16. Information suff | 1 | 6 | 20 | 12 | 7 | 3 (3-4) | 9 (17%) | 5 (9%) | 53 | 0 | 3 |
|  | X. Waiting time | 4 | 4 | 17 | 16 | 8 | 3 (3-4) | 12 (27%) | 7 (12%) | 53 | 0 | 3 |
|  | 17. Appointment time | 2 | 2 | 20 | 11 | 9 | 3 (3-4) | 10 (19%) | 2 (3%) | 53 | 0 | 3 |
|  | 18. Caretaker involve | 9 | 5 | 6 | 10 | 9 | 3 (2-4) | 9 (18%) | 2 (3%) | 51 | 0 | 2 |
| Out-of hours GP |  |  |  |  |  |  |  |  |  | 23 |  |  |
|  | 7. Involved decisions | 1 | 1 | 4 | 8 | 6 | 4 (-3) | 3 (13%) | 0 (<1%) | 23 | -1 | 4 |
|  | 8. Worries | 0 | 2 | 6 | 9 | 3 | 4 (3-4) | 3 (13%) | 0 (<1%) | 23 | 0 | 2 |
|  | 9. Involved planning | 0 | 4 | 7 | 4 | 2 | 3 (3-4) | 6 (26%) | 0 (<1%) | 23 | 0 | 2 |
|  | 10. Holistic approach | 12 | 2 | 3 | 2 | 0 | 1 (1-3) | 4 (17%) | 0 (<1%) | 23 | 1 | 3 |
|  | 11. Caring care | 0 | 4 | 5 | 7 | 3 | 4 (3-4) | 3 (14%) | 1 (4%) | 22 | 0 | 2 |
|  | 12. Trust | 2 | 3 | 4 | 3 | 4 | 3 (2-5) | 6 (27%) | 1 (4%) | 22 | 0 | 2 |
|  | 13. Trust qualifications | 1 | 1 | 6 | 5 | 5 | 4 (3-5) | 4 (18%) | 1 (4%) | 22 | -1 | 3 |
|  | 14. Know story | 3 | 7 | 4 | 2 | 0 | 2 (2-3) | 5 (24%) | 2 (9%) | 21 | 0 | 2 |
|  | 15. Information compre | 1 | 2 | 1 | 8 | 6 | 4 (4-5) | 3 (14%) | 2 (9%) | 21 | -1 | 3 |
|  | 16. Information suff | 1 | 2 | 6 | 6 | 3 | 4 (3-4) | 3 (14%) | 2 (9%) | 21 | 0 | 3 |
|  | X. Waiting time | 1 | 3 | 4 | 2 | 1 | 3 (2-4) | 8 (42%) | 4 (17%) | 19 | 0 | 2 |
|  | 17. Appointment time | 1 | 2 | 4 | 3 | 2 | 3 (3-4) | 8 (40%) | 3 (13%) | 20 | 0 | 2 |
|  | 18. Caretaker involve | 2 | 3 | 4 | 2 | 4 | 3 (2-5) | 5 (25%) | 3 (13%) | 20 | 0 | 2 |
| Municipal rehabilitation |  |  |  |  |  |  |  |  |  | 166 |  |  |
|  | 7. Involved decisions | 5 | 14 | 32 | 64 | 48 | 4 (3-5) | 2 (1%) | 1 (<1%) | 165 | -1 | 3 |
|  | 8. Worries | 4 | 11 | 28 | 69 | 44 | 4 (3-5) | 8 (5%) | 2 (1%) | 164 | -1 | 3 |
|  | 9. Involved planning | 11 | 16 | 36 | 65 | 31 | 4 (3-4) | 5 (3%) | 2 (1%) | 164 | -1 | 3 |
|  | 10. Holistic approach | 27 | 27 | 39 | 43 | 20 | 3 (2-4) | 9 (5%) | 1 (<1%) | 165 | 0 | 2 |
|  | 11. Caring care | 3 | 8 | 20 | 68 | 60 | 4 (4-5) | 3 (2%) | 4 (2%) | 162 | -1 | 4 |
|  | 12. Trust | 4 | 6 | 30 | 59 | 47 | 4 (3-5) | 16 (10%) | 4 (2%) | 162 | -1 | 4 |
|  | 13. Trust qualifications | 4 | 4 | 22 | 77 | 49 | 4 (4-5) | 5 (3%) | 5 (3%) | 161 | -1 | 5 |
|  | 14. Know story | 12 | 29 | 38 | 57 | 17 | 3 (2-4) | 6 (4%) | 7 (4%) | 159 | 0 | 2 |
|  | 15. Information compre | 4 | 7 | 26 | 80 | 40 | 4 (4-5) | 3 (2%) | 6 (4%) | 160 | -1 | 4 |
|  | 16. Information suff | 4 | 9 | 34 | 66 | 43 | 4 (3-5) | 4 (3%) | 6 (4%) | 160 | -1 | 3 |
|  | X. Waiting time | 1 | 4 | 8 | 63 | 76 | 5 (4-5) | 5 (3%) | 9 (5%) | 157 | -1 | 6 |
|  | 17. Appointment time | 3 | 7 | 21 | 67 | 52 | 4 (4-5) | 7 (4%) | 9 S(5%) | 157 | -1 | 4 |
|  | 18. Caretaker involve | 32 | 11 | 17 | 32 | 17 | 3 (1-4) | 51 (32%) | 6 (4%) | 160 | 0 | 2 |
| Early Childhood Nurse |  |  |  |  |  |  |  |  |  | 63 |  |  |
|  | 7. Involved decisions | 0 | 0 | 3 | 19 | 30 | 5 (4-5) | 2 (4%) | 9 (14%) | 54 | -1 | 3 |
|  | 8. Worries | 0 | 0 | 4 | 11 | 36 | 5 (4-5) | 4 (7%) | 8 (13%) | 55 | -1 | 4 |
|  | 9. Involved planning | 1 | 0 | 6 | 15 | 21 | 4 (4-5) | 12 (22%) | 8 (13%) | 55 | -1 | 6 |
|  | 10. Holistic approach | 3 | 3 | 10 | 13 | 15 | 4 (3-5) | 10 (19%) | 9 (14%) | 54 | -1 | 3 |
|  | 11. Caring care | 0 | 0 | 3 | 14 | 34 | 5 (4-5) | 2 (4%) | 10 (16%) | 53 | -1 | 4 |
|  | 12. Trust | 0 | 0 | 6 | 14 | 29 | 5 (4-5) | 3 (6%) | 11 (17%) | 52 | -1 | 3 |
|  | 13. Trust qualifications | 0 | 1 | 3 | 21 | 25 | 5 (4-5) | 3 (6%) | 10 (16%) | 53 | -1 | 4 |
|  | 14. Know story | 4 | 2 | 16 | 14 | 12 | 4 (3-5) | 4 (8%) | 11 (17%) | 52 | -1 | 3 |
|  | 15. Information compre | 0 | 0 | 4 | 19 | 28 | 5 (4-5) | 1 (2%) | 11 (17%) | 52 | -1 | 3 |
|  | 16. Information suff | 0 | 0 | 5 | 23 | 22 | 4 (4-5) | 1 (2%) | 12 (19%) | 51 | 0 | 2 |
|  | X. Waiting time | 0 | 1 | 4 | 23 | 22 | 4 (4-5) | 0 (<1%) | 13 (21%) | 50 | -1 | 4 |
|  | 17. Appointment time | 0 | 0 | 0 | 15 | 35 | 5 (4-5) | 0 (<1%) | 13 (21%) | 50 | -1 | 2 |
|  | 18. Caretaker involve | 0 | 0 | 4 | 16 | 26 | 5 (4-5) | 5 (10%) | 12 (19%) | 51 | -1 | 3 |
