# Supplementary material for: Patients’ Assessment of Transitions in Healthcare Settings: Development and Psychometric Analysis of the PATH questionnaire
Source: Research Square preprint supplement (doi:10.21203/rs.3.rs-6948404/v1), 2025-07-14
Supplement: Supplementary file 6 [file b493a57aca82ed5580b73e84.docx]

**Table 2 - Demographic description of participants in the field-test (complete and incomplete PATH responses)**

|  |  | Total n | Complete n (%) | Incomplete n (%) |  |
| --- | --- | --- | --- | --- | --- |
| Sex | Male | 82 | 65 (79) | 17 (21) |  |
|  | Female | 247 | 208 (84) | 39 (16) | p=0.3121 |
|  |  |  |  |  |  |
| Age | 18-29 | 37 | 32 (86) | 5 (14) |  |
|  | 30-39 | 61 | 45 (74) | 16 (26) |  |
|  | 40-49 | 11 | 10 (91) | 1 (9) |  |
|  | 50-59 | 34 | 32 (94) | 2 (6) |  |
|  | 60-69 | 65 | 58 (89) | 7 (11) |  |
|  | 70-79 | 88 | 70 (80) | 18 (20) |  |
|  | > 80 | 33 | 26 (79) | 7 (21) | p=0.1111 |
|  |  |  |  |  |  |
| Discharge unit | Gynecology OUH3 | 40 | 38 (95) | 2 (5) |  |
|  | Obstetric OUH3 | 89 | 67 (75) | 22 (25) |  |
|  | Geriatric SNR4 | 13 | 12 (92) | 1 (8) |  |
|  | Orthopedic Surgery SNR4 | 135 | 113 (84) | 22 (16) |  |
|  | Psychiatry SNR4 | 1 | 1 (100) |  |  |
|  | General Medicine SNR4 | 2 | 2 (100) |  |  |
|  | Physio- and Occupational therapy SNR4 | 16 | 14 (88) | 2 (12) |  |
|  | Neurology SNR4 | 9 | 7 (78) | 2 (22) |  |
|  | Emergency SNR4 | 6 | 6 (100) |  |  |
|  | Other5 | 18 | 13 (72) | 5 (28) | p=0.2602 |
|  |  |  |  |  |  |
| **Total** |  | **329** | **273 (83)** | **56 (17)** |  |
|  | 1 Fisher’s exact test; 2 Pearson’s chi2  test; 3 Odense University Hospital including Svendborg location; 4 Slagelse, Naestved, and Ringsted Hospitals; 5 Gastroenterology, Clinical Oncology, Pulmonary Medicine, Cardiology, and Surgical Unit SNR | | | | |
