# Supplementary material for: Patients’ Assessment of Transitions in Healthcare Settings: Development and Psychometric Analysis of the PATH questionnaire
Source: Research Square preprint supplement (doi:10.21203/rs.3.rs-6948404/v1), 2025-07-14
Supplement: Supplementary file 7 [file bcea3fec812b58579a7c9812.docx]

| **Table 1 – Pilot-tested items for PATH** | | | **N=16** |
| --- | --- | --- | --- |
| Item number | Item | Relevance mean (0-10) | Need for discrimination between healthcare setting |
| 1 | Do you have a regular healthcare professional who knows what is going on with you? | 8.1 | No |
| 2 | Have you had access to help when you have needed it? | (Item re-worded after the scoring of relevance was conducted) |  |
| 3 | Have you had the opportunity to ask questions when you have needed to? | 8.3 | No |
| 4 | Has the information you have received from the health professionals been consistent? | 8.2 | No |
| 5 | Has there been a plan for what was going to happen to you? | 9.1 | No |
| 6 | Have the efforts regarding your health been well coordinated? | 8.9 | No |
| 7 | Have you been involved in the decisions about your health to the extent that you wanted? | 9.4 | Yes |
| 8 | Do you feel your concerns have been listened to? | 8.8 | Yes |
| 9 | Have you been involved in the scheduling of your treatment? | 9.5 | Yes |
| 10 | Have you been asked about how your health has affected your life? | 8.4 | Yes |
| 11 | Have you been treated in a compassionate way by the health professionals? | 9.7 | Yes |
| 12 | Have you felt comfortable telling the healthcare professionals personal things about yourself? | 9 | Yes |
| 13 | Have you had confidence in the professional competence of the health professionals? | 8.7 | Yes |
| 14 | Did the health professionals know your story? | 8.7 | Yes |
| 15 | Has the information you have received been understandable? | 9.4 | Yes |
| 16 | Have you received all the information you have needed? | 9.4 | Yes |
| X | When I have had an appointment, there has not been waiting time. | 7.4 | Yes |
| 17 | When you have had appointments with health professionals, did you feel that you were given enough time? | 7.4 | Yes |
| 18 | Have your relatives been involved to the extent you have wanted? | 7.5 | Yes |
