# Supplementary material for: Patients’ Assessment of Transitions in Healthcare Settings: Development and Psychometric Analysis of the PATH questionnaire
Source: Research Square preprint supplement (doi:10.21203/rs.3.rs-6948404/v1), 2025-07-14
Supplement: Supplementary file 8 [file d4606664005002a9de5df2aa.docx]

**Appendix 4: Number of factors to extract**

*Table 1: Minimum average partial correlation of principal components*

| Minap | Number of factors | average partial correlation |
| --- | --- | --- |
| m=0 | f=0 | 0.27045299 |
| m=1 | f=1 | 0.02465678 |
| m=2 | f=2 | 0.0224226 |
| m=3 | f=3 | 0.02400917 |
| m=4 | f=4 | 0.003006254 |

Minap – Velicer’s minimum average partial correlation suggests 2 factors to extract (average partial correlation 0.022)

*Figure 1: Scree plot of eigenvalues*

The scree plot seen in figure 1 shows eigenvalues before rotation. This figure suggests a 1 factor-solution.


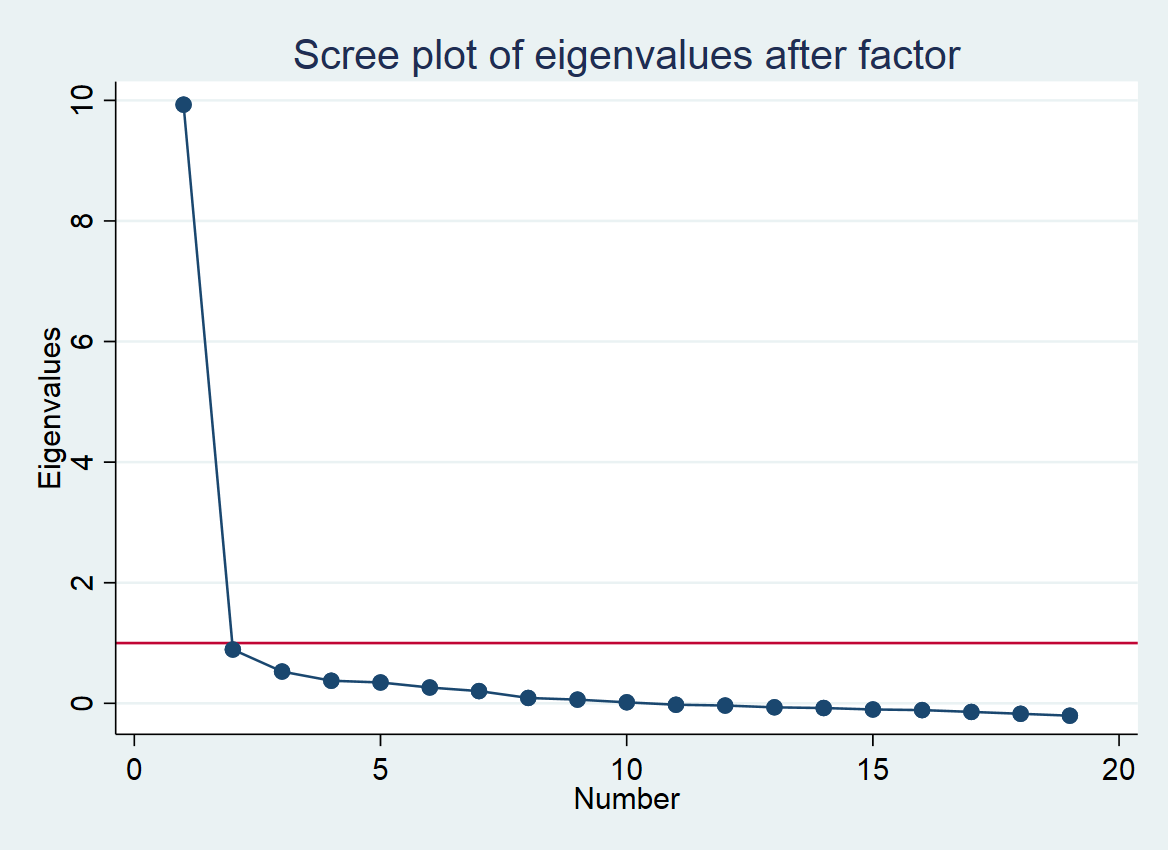


*Figure 2: Parallel analysis*

The parallel analysis depicted below suggests extracting 2 factors.


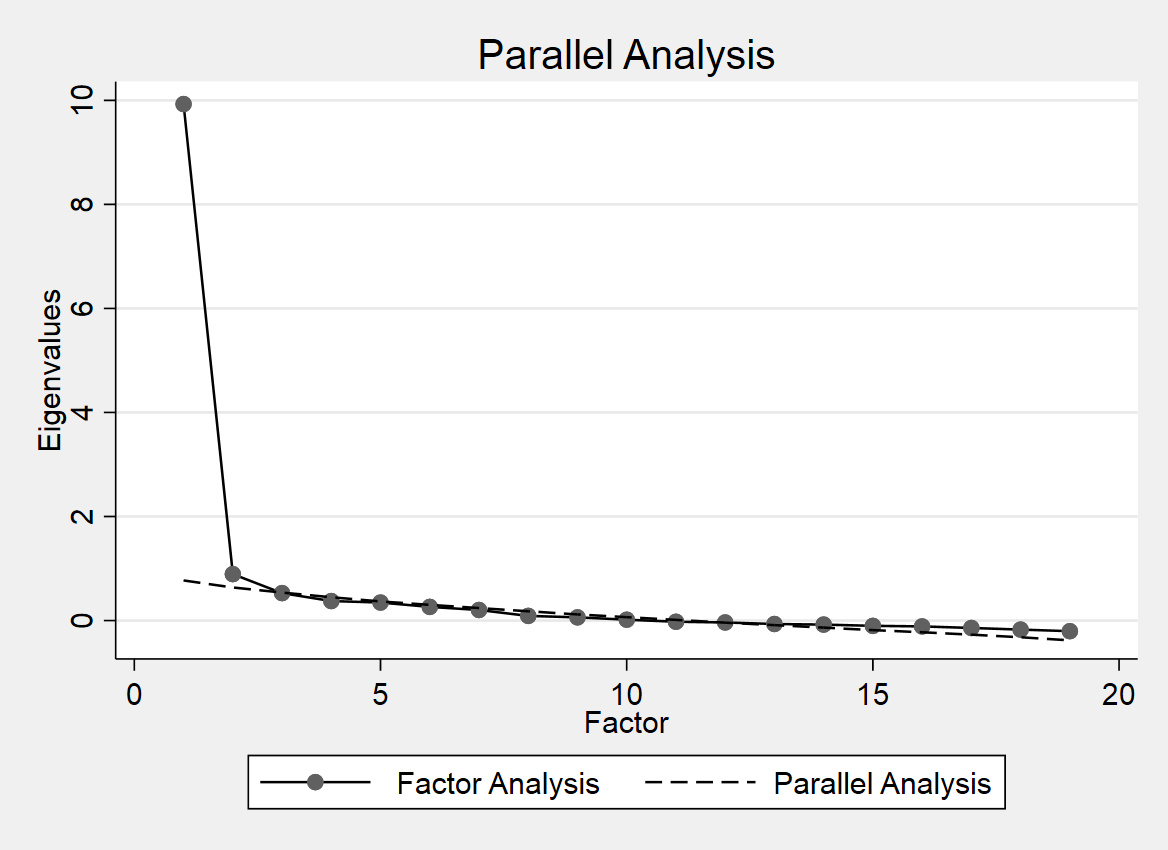


*Minus fit correlation matrix*

After rotation and removal of items “waiting times” and “know story”. Approximately 7% of the items have values greater than 0.05 in the minus fit correlation matrix (estat residuals).
